# Supplementary material
Source: PubMed Central journal article supplement (PMC3754185)
Supplement: AEM.01483-13_zam999104701so1.pdf [file AEM.01483-13_zam999104701so1.pdf]

**Supplemental Material to**

**Core Fluxome and meta fluxome of lactic acid bacteria under cocoa pulp  
fermentation simulating conditions**

Philipp Adler<sup>a</sup>, Christoph Josef Bolten<sup>b</sup>, Katrin Dohnt<sup>a</sup>, Carl Erik Hansen<sup>b</sup>, Christoph  
Wittmann<sup>a\*</sup>

*<sup>a</sup>Institute of Biochemical Engineering, Technische Universität Braunschweig,  
Gaußstraße 17, 38106 Braunschweig, Germany*

*<sup>b</sup>Nestlé Research Center, Vers-Chez-Les-Blanc, 1000 Lausanne 26 Switzerland*

\*Corresponding author: Fax: +49 531 391 7652; Phone: +49 531 391 7651

*E-Mail address: c.wittmann@tu-braunschweig.de*

## 1. Carbon mass isotopomer fractions of secreted products lactate and acetate in pure cultures of lactic acid bacteria

**Table S1: Experimental and predicted mass isotopomer distributions of lactate and acetate [% of total pool] in pure cultures of *L. fermentum* NCC 575 grown in cocoa pulp simulation medium**

| Analyte     | Mass isotopomer fraction | Source <sup>a</sup> | Labeled substrate                       |                                          |                                             |
|-------------|--------------------------|---------------------|-----------------------------------------|------------------------------------------|---------------------------------------------|
|             |                          |                     | [ <sup>13</sup> C <sub>6</sub> ]glucose | [ <sup>13</sup> C <sub>6</sub> ]fructose | [1,2- <sup>13</sup> C <sub>2</sub> ]glucose |
| Lactate     | <i>m</i> +0              | Exp.                | 32.0 ± 0.0                              | 94.2 ± 0.0                               | 96.9 ± 0.1                                  |
|             |                          | Sim.                | 39.3                                    | 94.1                                     | 96.8                                        |
|             | <i>m</i> +1              | Exp.                | 1.3 ± 0.0                               | 3.0 ± 0.0                                | 3.0 ± 0.0                                   |
|             |                          | Sim.                | 1.3                                     | 3.1                                      | 3.1                                         |
|             | <i>m</i> +2              | Exp.                | 2.7 ± 0.0                               | 0.1 ± 0.0                                | 0.0 ± 0.0                                   |
|             |                          | Sim.                | 1.8                                     | 0.1                                      | 0.0                                         |
| <i>m</i> +3 | Exp.                     | 64.0 ± 0.0          | 2.7 ± 0.0                               | 0.0 ± 0.0                                |                                             |
|             | Sim.                     | 57.6                | 2.7                                     | 0.0                                      |                                             |
| Acetate     | <i>m</i> +0              | Exp.                | 50.1 ± 0.3                              | 94.4 ± 0.0                               | 49.1 ± 0.0                                  |
|             |                          | Sim.                | 39.8                                    | 95.1                                     | 43.3                                        |
|             | <i>m</i> +1              | Exp.                | 3.1 ± 0.1                               | 2.8 ± 0.0                                | 49.7 ± 0.0                                  |
|             |                          | Sim.                | 2.0                                     | 2.1                                      | 56.1                                        |
|             | <i>m</i> +2              | Exp.                | 49.5 ± 0.4                              | 2.8 ± 0.0                                | 1.1 ± 0.0                                   |
|             |                          | Sim.                | 58.2                                    | 2.8                                      | 0.1                                         |

<sup>a</sup>Experimental data (Exp.) were obtained from GC/MS measurements of TBDMS<sub>2</sub>-lactate and acetic acid (pentyl ester) after correction factor analysis. Predicted data (Sim.) correspond to model simulations at the optimized flux distribution.

**Table S2: Experimental and predicted mass isotopomer distributions of lactate and acetate [% of total pool] in pure cultures of *L. fermentum* NCC 528 grown in cocoa pulp simulation medium**

| Analyte              | Mass isotopomer fraction | Source <sup>a</sup> | Labeled substrate                       |                                          |                                             |
|----------------------|--------------------------|---------------------|-----------------------------------------|------------------------------------------|---------------------------------------------|
|                      |                          |                     | [ <sup>13</sup> C <sub>6</sub> ]glucose | [ <sup>13</sup> C <sub>6</sub> ]fructose | [1,2- <sup>13</sup> C <sub>2</sub> ]glucose |
| Lactate              | <i>m</i> +0              | Exp.                | 80.7 ± 0.0                              | 96.0 ± 0.0                               | 96.8 ± 0.1                                  |
|                      |                          | Sim.                | 81.2                                    | 95.9                                     | 96.8                                        |
|                      | <i>m</i> +1              | Exp.                | 2.6 ± 0.1                               | 3.0 ± 0.0                                | 3.1 ± 0.1                                   |
|                      |                          | Sim.                | 2.6                                     | 3.1                                      | 3.1                                         |
|                      | <i>m</i> +2              | Exp.                | 1.0 ± 0.1                               | 0.1 ± 0.0                                | 0.0 ± 0.0                                   |
|                      |                          | Sim.                | 0.5                                     | 0.1                                      | 0.1                                         |
| <i>m</i> +3          | Exp.                     | 15.7 ± 0.0          | 0.9 ± 0.0                               | 0.0 ± 0.0                                |                                             |
|                      | Sim.                     | 15.7                | 0.9                                     | 0.0                                      |                                             |
| Acetate <sup>b</sup> | <i>m</i> +0              | Exp.                | 78.6 ± 0.0                              | 95.2 ± 0.0                               | 79.6 ± 0.0                                  |
|                      |                          | Sim.                | 82.1                                    | 96.9                                     | 86.6                                        |
|                      | <i>m</i> +1              | Exp.                | 3.3 ± 0.0                               | 3.0 ± 0.0                                | 19.2 ± 0.0                                  |
|                      |                          | Sim.                | 2.1                                     | 2.1                                      | 13.3                                        |
|                      | <i>m</i> +2              | Exp.                | 18.1 ± 0.0                              | 1.8 ± 0.0                                | 1.1 ± 0.0                                   |
|                      |                          | Sim.                | 15.8                                    | 0.1                                      | 0.1                                         |

<sup>a</sup>Experimental data (Exp.) were obtained from GC/MS measurements of TBDMS<sub>2</sub>-lactate and acetic acid (pentyl ester) after correction factor analysis. Predicted data (Sim.) correspond to model simulations at the optimized flux distribution.

**Table S3: Experimental and predicted mass isotopomer distributions of lactate and acetate [% of total pool] in pure cultures of *L. plantarum* NCC 2829 grown in cocoa pulp simulation medium**

| Analyte     | Mass isotopomer fraction | Source <sup>a</sup> | Labeled substrate                       |                                          |                                             |
|-------------|--------------------------|---------------------|-----------------------------------------|------------------------------------------|---------------------------------------------|
|             |                          |                     | [ <sup>13</sup> C <sub>6</sub> ]glucose | [ <sup>13</sup> C <sub>6</sub> ]fructose | [1,2- <sup>13</sup> C <sub>2</sub> ]glucose |
| Lactate     | <i>m</i> +0              | Exp.                | 69.1 ± 0.3                              | 36.6 ± 0.0                               | 84.5 ± 0.1                                  |
|             |                          | Sim.                | 69.5                                    | 36.0                                     | 84.6                                        |
|             | <i>m</i> +1              | Exp.                | 2.5 ± 0.1                               | 1.3 ± 0.0                                | 3.1 ± 0.0                                   |
|             |                          | Sim.                | 2.3                                     | 1.2                                      | 3.0                                         |
|             | <i>m</i> +2              | Exp.                | 1.1 ± 0.1                               | 1.1 ± 0.0                                | 12.2 ± 0.0                                  |
|             |                          | Sim.                | 0.9                                     | 1.9                                      | 12.3                                        |
| <i>m</i> +3 | Exp.                     | 27.3 ± 0.1          | 61.0 ± 0.0                              | 0.2 ± 0.0                                |                                             |
|             | Sim.                     | 27.4                | 60.8                                    | 0.1                                      |                                             |
| Acetate     | <i>m</i> +0              | Exp.                | 69.1 ± 0.1                              | 86.0 ± 0.2                               | 74.1 ± 0.1                                  |
|             |                          | Sim.                | 77.6                                    | 80.1                                     | 78.2                                        |
|             | <i>m</i> +1              | Exp.                | 3.0 ± 0.1                               | 2.7 ± 0.1                                | 22.8 ± 0.1                                  |
|             |                          | Sim.                | 2.1                                     | 2.1                                      | 21.2                                        |
|             | <i>m</i> +2              | Exp.                | 27.9 ± 0.2                              | 11.4 ± 0.3                               | 3.1 ± 0.1                                   |
|             |                          | Sim.                | 20.3                                    | 17.8                                     | 0.1                                         |

<sup>a</sup>Experimental data (Exp.) were obtained from GC/MS measurements of TBDMS<sub>2</sub>-lactate and acetic acid (pentyl ester) after correction factor analysis. Predicted data (Sim.) correspond to model simulations at the optimized flux distribution.

**Table S4: Experimental and predicted mass isotopomer distributions of lactate and acetate [% of total pool] in pure cultures of *L. plantarum* NCC 1295 grown in cocoa pulp simulation medium**

| Analyte              | Mass isotopomer fraction | Source <sup>a</sup> | Labeled substrate                       |                                          |                                             |
|----------------------|--------------------------|---------------------|-----------------------------------------|------------------------------------------|---------------------------------------------|
|                      |                          |                     | [ <sup>13</sup> C <sub>6</sub> ]glucose | [ <sup>13</sup> C <sub>6</sub> ]fructose | [1,2- <sup>13</sup> C <sub>2</sub> ]glucose |
| Lactate              | <i>m</i> +0              | Exp.                | 32.6 ± 0.0                              | 65.3 ± 0.0                               | 66.6 ± 0.0                                  |
|                      |                          | Sim.                | 33.3                                    | 65.2                                     | 66.4                                        |
|                      | <i>m</i> +1              | Exp.                | 1.3 ± 0.0                               | 2.2 ± 0.0                                | 2.4 ± 0.0                                   |
|                      |                          | Sim.                | 1.1                                     | 2.1                                      | 2.8                                         |
|                      | <i>m</i> +2              | Exp.                | 2.6 ± 0.0                               | 0.7 ± 0.0                                | 30.7 ± 0.0                                  |
|                      |                          | Sim.                | 2.0                                     | 1.0                                      | 30.5                                        |
| <i>m</i> +3          | Exp.                     | 63.5 ± 0.0          | 31.7 ± 0.0                              | 0.4 ± 0.0                                |                                             |
|                      | Sim.                     | 63.6                | 31.7                                    | 0.3                                      |                                             |
| Acetate <sup>b</sup> | <i>m</i> +0              | Exp.                | 49.8 ± 0.0                              | 84.2 ± 0.0                               | 62.5 ± 0.0                                  |
|                      |                          | Sim.                | 37.1                                    | 86.0                                     | 49.7                                        |
|                      | <i>m</i> +1              | Exp.                | 3.8 ± 0.0                               | 3.2 ± 0.0                                | 24.9 ± 0.0                                  |
|                      |                          | Sim.                | 2.0                                     | 2.1                                      | 38.5                                        |
|                      | <i>m</i> +2              | Exp.                | 46.4 ± 0.0                              | 12.6 ± 0.0                               | 12.6 ± 0.0                                  |
|                      |                          | Sim.                | 60.9                                    | 11.9                                     | 11.7                                        |

<sup>a</sup>Experimental data (Exp.) were obtained from GC/MS measurements of TBDMS<sub>2</sub>-lactate and acetic acid (pentyl ester) after correction factor analysis. Predicted data (Sim.) correspond to model simulations at the optimized flux distribution.

## 2. Carbon mass isotopomer fractions of secreted products lactate and acetate in mixed cultures of lactic acid bacteria

**Table S5: Experimental and predicted mass isotopomer distributions of lactate and acetate [% of total pool] in mixed cultures of *L. fermentum* NCC 575 grown cocoa in pulp simulation medium**

| Analyte     | Mass isotopomer fraction | Source <sup>a</sup> | Labeled substrate                       |                                          |                                             |
|-------------|--------------------------|---------------------|-----------------------------------------|------------------------------------------|---------------------------------------------|
|             |                          |                     | [ <sup>13</sup> C <sub>6</sub> ]glucose | [ <sup>13</sup> C <sub>6</sub> ]fructose | [1,2- <sup>13</sup> C <sub>2</sub> ]glucose |
| Lactate     | <i>m</i> +0              | Exp.                | 36.6 ± 0.0                              | 91.4 ± 0.0                               | 94.6 ± 0.0                                  |
|             |                          | Sim.                | 36.6                                    | 91.3                                     | 94.5                                        |
|             | <i>m</i> +1              | Exp.                | 1.3 ± 0.0                               | 2.8 ± 0.0                                | 3.0 ± 0.0                                   |
|             |                          | Sim.                | 1.2                                     | 3.0                                      | 3.1                                         |
|             | <i>m</i> +2              | Exp.                | 2.3 ± 0.0                               | 0.1 ± 0.0                                | 2.4 ± 0.0                                   |
|             |                          | Sim.                | 1.8                                     | 0.2                                      | 2.3                                         |
| <i>m</i> +3 | Exp.                     | 59.9 ± 0.0          | 5.6 ± 0.0                               | 0.0 ± 0.0                                |                                             |
|             | Sim.                     | 60.4                | 5.5                                     | 0.0                                      |                                             |
| Acetate     | <i>m</i> +0              | Exp.                | 44.7 ± 0.0                              | 93.7 ± 0.1                               | 46.8 ± 0.0                                  |
|             |                          | Sim.                | 38.4                                    | 92.6                                     | 39.5                                        |
|             | <i>m</i> +1              | Exp.                | 4.0 ± 0.0                               | 3.0 ± 0.0                                | 51.8 ± 0.0                                  |
|             |                          | Sim.                | 2.0                                     | 2.1                                      | 59.8                                        |
|             | <i>m</i> +2              | Exp.                | 51.3 ± 0.0                              | 3.3 ± 0.0                                | 1.4 ± 0.0                                   |
|             |                          | Sim.                | 59.6                                    | 5.3                                      | 0.1                                         |

<sup>a</sup>Experimental data (Exp.) were obtained from GC/MS measurements of TBDMS<sub>2</sub>-lactate and acetic acid (pentyl ester) after correction factor analysis. Predicted data (Sim.) correspond to model simulations at the optimized flux distribution.

**Table S6: Experimental and predicted mass isotopomer distributions of lactate and acetate [% of total pool] in mixed cultures of *L. fermentum* NCC 528 grown in cocoa pulp simulation medium**

| Analyte              | Mass isotopomer fraction | Source <sup>a</sup> | Labeled substrate                       |                                          |                                             |
|----------------------|--------------------------|---------------------|-----------------------------------------|------------------------------------------|---------------------------------------------|
|                      |                          |                     | [ <sup>13</sup> C <sub>6</sub> ]glucose | [ <sup>13</sup> C <sub>6</sub> ]fructose | [1,2- <sup>13</sup> C <sub>2</sub> ]glucose |
| Lactate              | m+0                      | Exp.                | 47.0 ± 0.0                              | 58.6 ± 0.0                               | 72.5 ± 0.1                                  |
|                      |                          | Sim.                | 41.9                                    | 57.4                                     | 71.9                                        |
|                      | m+1                      | Exp.                | 1.5 ± 0.0                               | 2.0 ± 0.0                                | 2.5 ± 0.1                                   |
|                      |                          | Sim.                | 1.4                                     | 1.9                                      | 2.5                                         |
|                      | m+2                      | Exp.                | 1.9 ± 0.0                               | 0.8 ± 0.0                                | 24.8 ± 0.0                                  |
|                      |                          | Sim.                | 1.7                                     | 1.2                                      | 24.8                                        |
| m+3                  | Exp.                     | 49.5 ± 0.0          | 38.6 ± 0.0                              | 0.2 ± 0.0                                |                                             |
|                      | Sim.                     | 55.0                | 39.5                                    | 0.2                                      |                                             |
| Acetate <sup>b</sup> | m+0                      | Exp.                | 65.3 ± 0.1                              | 89.7 ± 0.0                               | 70.9 ± 0.0                                  |
|                      |                          | Sim.                | 36.9                                    | 89.7                                     | 37.5                                        |
|                      | m+1                      | Exp.                | 3.5 ± 0.1                               | 3.1 ± 0.0                                | 23.8 ± 0.0                                  |
|                      |                          | Sim.                | 2.0                                     | 2.1                                      | 61.8                                        |
|                      | m+2                      | Exp.                | 31.3 ± 0.0                              | 7.3 ± 0.0                                | 5.3 ± 0.0                                   |
|                      |                          | Sim.                | 61.1                                    | 8.2                                      | 0.7                                         |

<sup>a</sup>Experimental data (Exp.) were obtained from GC/MS measurements of TBDMS<sub>2</sub>-lactate and acetic acid (pentyl ester) after correction factor analysis. Predicted data (Sim.) correspond to model simulations at the optimized flux distribution.

**Table S7: Experimental and predicted mass isotopomer distributions of lactate and acetate [% of total pool] in mixed cultures of *L. plantarum* NCC 2829 grown in cocoa pulp simulation medium**

| Analyte | Mass isotopomer fraction | Source <sup>a</sup> | Labeled substrate                       |                                          |                                             |
|---------|--------------------------|---------------------|-----------------------------------------|------------------------------------------|---------------------------------------------|
|         |                          |                     | [ <sup>13</sup> C <sub>6</sub> ]glucose | [ <sup>13</sup> C <sub>6</sub> ]fructose | [1,2- <sup>13</sup> C <sub>2</sub> ]glucose |
| Lactate | m+0                      | Exp.                | 39.4 ± 0.0                              | 90.9 ± 0.0                               | 96.6 ± 0.0                                  |
|         |                          | Sim.                | 39.3                                    | 91.0                                     | 96.5                                        |
|         | m+1                      | Exp.                | 1.4 ± 0.0                               | 2.8 ± 0.0                                | 3.0 ± 0.0                                   |
|         |                          | Sim.                | 1.3                                     | 3.0                                      | 3.1                                         |
|         | m+2                      | Exp.                | 2.2 ± 0.0                               | 0.1 ± 0.0                                | 0.5 ± 0.0                                   |
|         |                          | Sim.                | 1.8                                     | 0.2                                      | 0.4                                         |
| m+3     | Exp.                     | 57.1 ± 0.0          | 6.2 ± 0.0                               | 0.0 ± 0.0                                |                                             |
|         | Sim.                     | 57.6                | 5.9                                     | 0.0                                      |                                             |
| Acetate | m+0                      | Exp.                | 50.2 ± 0.0                              | 91.2 ± 0.0                               | 51.0 ± 0.0                                  |
|         |                          | Sim.                | 39.8                                    | 92.2                                     | 40.4                                        |
|         | m+1                      | Exp.                | 3.9 ± 0.0                               | 3.0 ± 0.0                                | 47.6 ± 0.0                                  |
|         |                          | Sim.                | 2.0                                     | 2.1                                      | 58.9                                        |
|         | m+2                      | Exp.                | 45.9 ± 0.0                              | 5.8 ± 0.0                                | 1.3 ± 0.0                                   |
|         |                          | Sim.                | 58.1                                    | 5.7                                      | 0.6                                         |

<sup>a</sup>Experimental data (Exp.) were obtained from GC/MS measurements of TBDMS<sub>2</sub>-lactate and acetic acid (pentyl ester) after correction factor analysis. Predicted data (Sim.) correspond to model simulations at the optimized flux distribution.

**Table S8: Experimental and predicted mass isotopomer distributions of lactate and acetate [% of total pool] in mixed cultures of *L. plantarum* NCC 1295 grown in cocoa pulp simulation medium**

| Analyte     | Mass isotopomer fraction | Source <sup>a</sup> | Labeled substrate                       |                                          |                                             |
|-------------|--------------------------|---------------------|-----------------------------------------|------------------------------------------|---------------------------------------------|
|             |                          |                     | [ <sup>13</sup> C <sub>6</sub> ]glucose | [ <sup>13</sup> C <sub>6</sub> ]fructose | [1,2- <sup>13</sup> C <sub>2</sub> ]glucose |
| Lactate     | <i>m</i> +0              | Exp.                | 38.6 ± 0.1                              | 90.9 ± 0.0                               | 95.9 ± 0.0                                  |
|             |                          | Sim.                | 38.6                                    | 90.9                                     | 95.8                                        |
|             | <i>m</i> +1              | Exp.                | 1.3 ± 0.0                               | 2.8 ± 0.0                                | 3.0 ± 0.0                                   |
|             |                          | Sim.                | 1.3                                     | 3.0                                      | 3.1                                         |
|             | <i>m</i> +2              | Exp.                | 2.2 ± 0.0                               | 0.2 ± 0.0                                | 1.1 ± 0.0                                   |
|             |                          | Sim.                | 1.8                                     | 0.2                                      | 1.1                                         |
| <i>m</i> +3 | Exp.                     | 57.9 ± 0.0          | 6.2 ± 0.0                               | 0.0 ± 0.0                                |                                             |
|             | Sim.                     | 58.3                | 6.0                                     | 0.0                                      |                                             |
| Acetate     | <i>m</i> +0              | Exp.                | 57.9 ± 0.0                              | 91.4 ± 0.0                               | 51.2 ± 0.0                                  |
|             |                          | Sim.                | 39.8                                    | 92.0                                     | 40.3                                        |
|             | <i>m</i> +1              | Exp.                | 3.9 ± 0.0                               | 2.9 ± 0.0                                | 47.5 ± 0.0                                  |
|             |                          | Sim.                | 2.0                                     | 2.1                                      | 59.0                                        |
|             | <i>m</i> +2              | Exp.                | 46.7 ± 0.0                              | 5.7 ± 0.01                               | 1.3 ± 0.0                                   |
|             |                          | Sim.                | 58.2                                    | 5.9                                      | 0.5                                         |

<sup>a</sup>Experimental data (Exp.) were obtained from GC/MS measurements of TBDMS<sub>2</sub>-lactate and acetic acid (pentyl ester) after correction factor analysis. Predicted data (Sim.) correspond to model simulations at the optimized flux distribution.

### 3. Fermentation profiles of mixed cultures of lactic acid bacteria

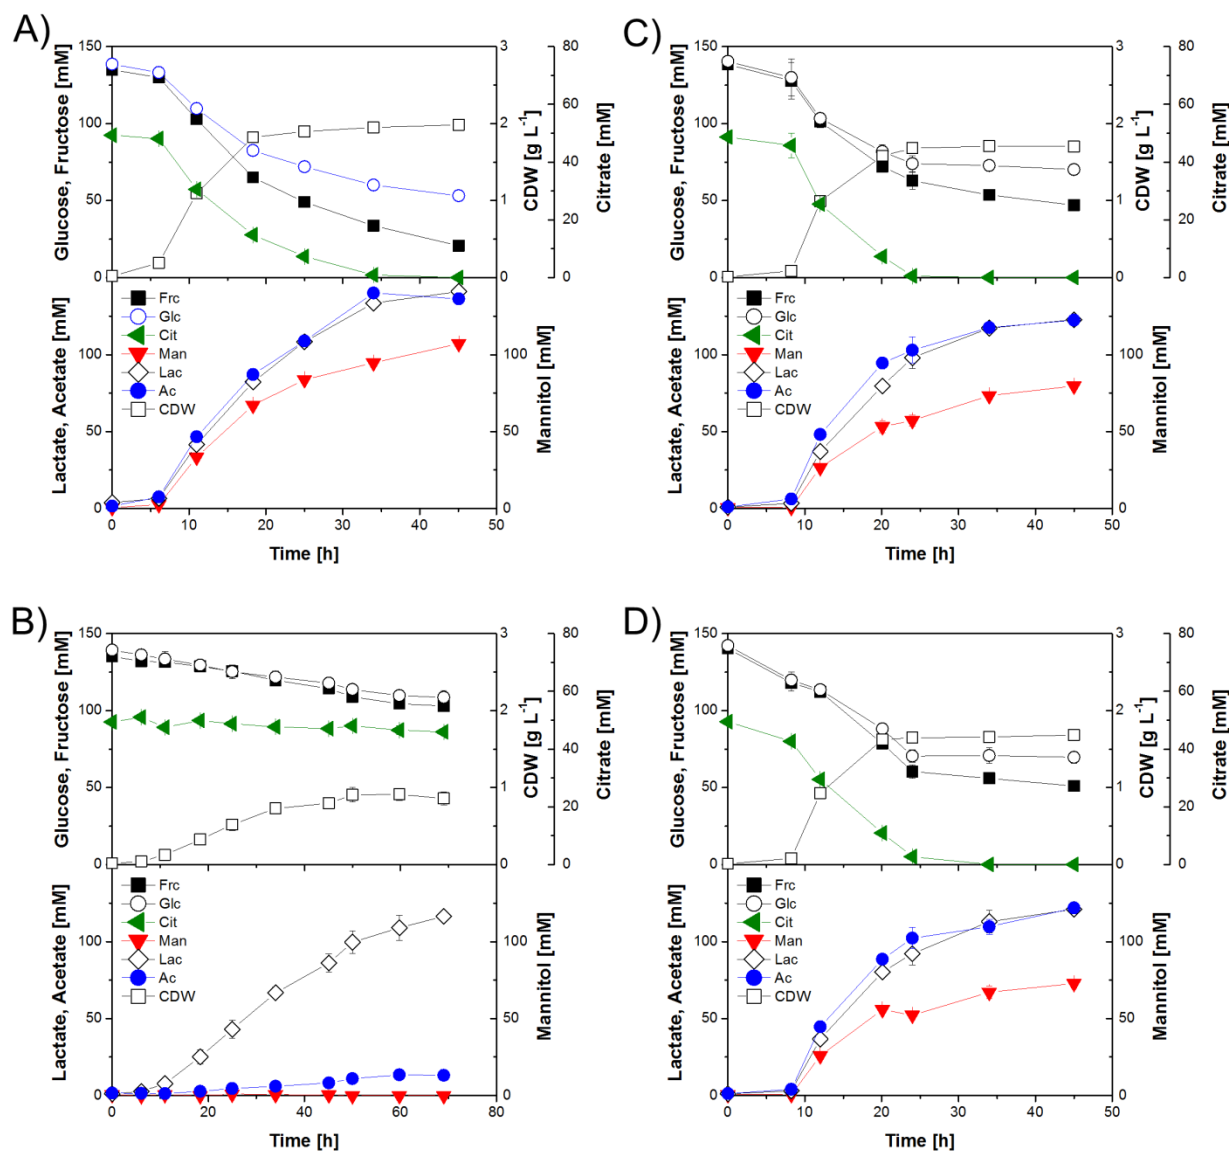

Figure S1: Fermentation profiles of mixed cultures of *L. fermentum* NCC 575 (A), *L. fermentum* NCC 528 (B), *L. plantarum* NCC 2829 (C), and *L. plantarum* NCC 1295 (D) in cocoa pulp simulation medium (refer to table 1 for more detailed information). The data represent mean values from two replicates and their corresponding standard deviations, respectively. Glc: glucose, Frc: fructose, Man: mannitol, Cit: citrate, Lac: lactate, Ac: acetate, CDW: cell dry weight.
